# Supplementary material for: Transcriptomic analysis of left-right differences in human embryonic forebrain and midbrain
Source: PubMed Central journal article supplement (PMC6122166; doi:10.1038/sdata.2018.164), 2018-09-04
Supplement: sdata2018164-s2.pdf [file sdata2018164-s2.pdf]

# **HUMkvhE [Transcriptome Resequencing Report]**

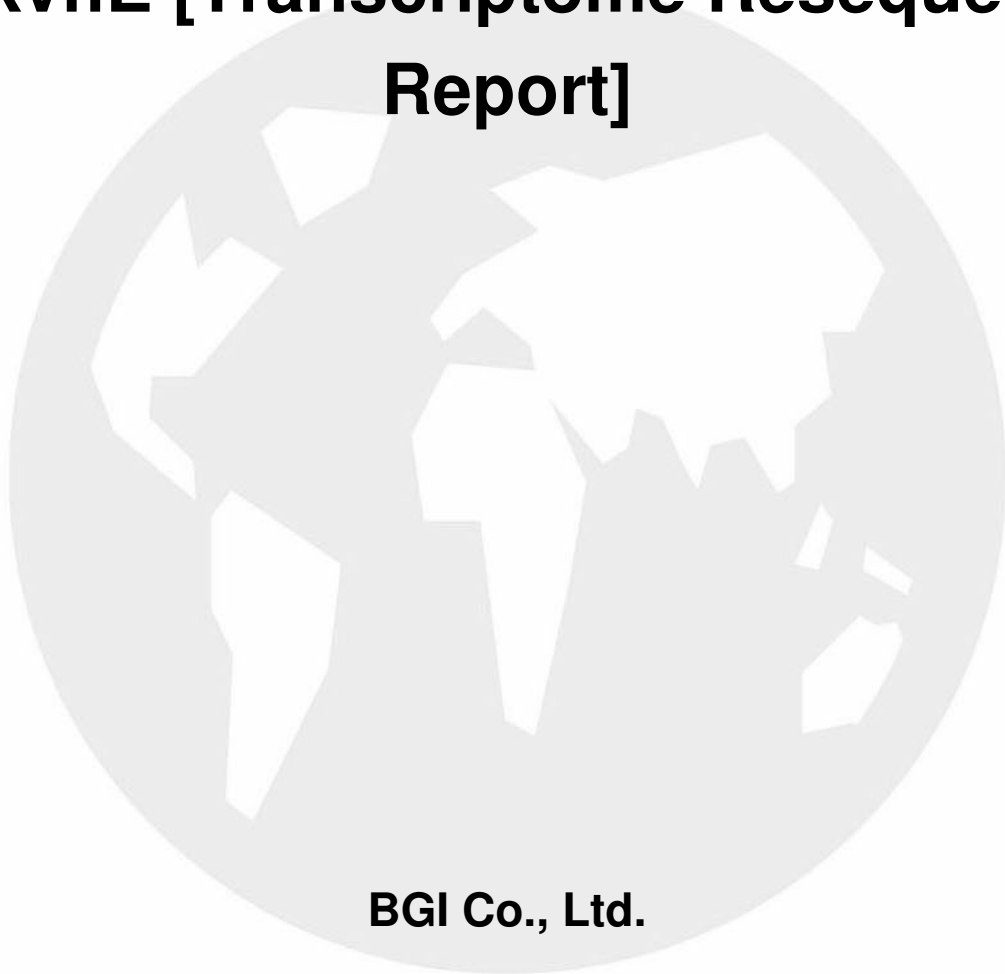

**BGI Co., Ltd.**

Thursday, 10th Nov., 2016

## Table of Contents

|                                                       |    |
|-------------------------------------------------------|----|
| Results                                               | 2  |
| 1 Abstract                                            | 2  |
| 2 Sequencing Reads Filtering                          | 2  |
| 3 Genome Mapping                                      | 3  |
| 4 SNP and INDEL Detection                             | 4  |
| 5 Gene Expression Analysis                            | 6  |
| Methods                                               | 9  |
| 1 Transcriptome Resequencing Study Process            | 10 |
| 2 Sequencing Reads Filtering                          | 10 |
| 3 Genome Mapping                                      | 10 |
| 4 SNP and INDEL Detection                             | 11 |
| 5 Gene Expression Analysis                            | 11 |
| Help                                                  | 11 |
| 1 FASTQ Format                                        | 11 |
| 2 What is TF                                          | 12 |
| 3 RNA editing format                                  | 12 |
| 4 Gene fusion format                                  | 12 |
| 5 DSG format                                          | 12 |
| 6 Gene expression list format                         | 13 |
| 7 DEG list format                                     | 13 |
| 8 MA plot                                             | 14 |
| 9 Volcano plot                                        | 14 |
| 10 Cluster list format                                | 14 |
| 11 VCF format                                         | 14 |
| 12 How to read DEG GO enrichment analysis result      | 14 |
| 13 How to read DEG pathway enrichment analysis result | 15 |
| References                                            | 16 |

# Results

## 1 Abstract

In our project, we sequence 24 samples use Illumina HiSeq platform, and on average we generated about 5.64 Gb bases from each sample. After mapping sequenced reads to reference genome and reconstruct transcripts, we finally get novel transcripts from all samples, of this, are previously unknown splicing event for known gene, are novel coding transcripts without any known features, and the remaining are long noncoding RNA.

## 2 Sequencing Reads Filtering

The sequencing reads which containing low-quality, adaptor-polluted and high content of unknown base(N) reads, should be processed to remove this reads before downstream analyses. After filtering, reads quality metrics are shown as Table 1 . The distribution of base content and quality are shown as Figure 1 and Figure 2 , respectively.

Table 1 Summary of sequencing reads after filtering. [\(Download\)](#)

| Sample     | Total Raw Reads(Mb) | Total Clean Reads(Mb) | Total Clean Bases(Gb) | Clean Reads Q20(%) | Clean Reads Q30(%) | Clean Reads Ratio(%) |
|------------|---------------------|-----------------------|-----------------------|--------------------|--------------------|----------------------|
| S13048-LFB | 57.73               | 54.69                 | 5.47                  | 99.03              | 96.56              | 94.72                |
| S13048-LMB | 58.99               | 56.04                 | 5.60                  | 99.06              | 96.71              | 95.00                |
| S13048-RFB | 65.43               | 62.34                 | 6.23                  | 99.08              | 96.75              | 95.27                |
| S13048-RMB | 74.01               | 70.53                 | 7.05                  | 99.06              | 96.75              | 95.30                |
| S13052-LFB | 45.54               | 43.44                 | 4.34                  | 99.06              | 96.66              | 95.39                |
| S13052-LMB | 53.60               | 50.87                 | 5.09                  | 98.91              | 96.15              | 94.91                |
| S13052-RFB | 73.43               | 69.77                 | 6.98                  | 99.06              | 96.69              | 95.02                |
| S13052-RMB | 70.17               | 66.68                 | 6.67                  | 99.02              | 96.59              | 95.02                |
| S13097-LFB | 68.91               | 65.36                 | 6.54                  | 98.94              | 96.30              | 94.85                |
| S13097-LMB | 46.95               | 44.81                 | 4.48                  | 99.08              | 96.69              | 95.44                |
| S13097-RFB | 75.61               | 72.08                 | 7.21                  | 99.07              | 96.74              | 95.33                |
| S13097-RMB | 45.87               | 43.37                 | 4.34                  | 98.95              | 96.29              | 94.55                |
| S13128-LFB | 76.64               | 72.60                 | 7.26                  | 99.04              | 96.58              | 94.73                |
| S13128-LMB | 65.18               | 61.97                 | 6.20                  | 99.06              | 96.66              | 95.08                |
| S13128-RFB | 53.13               | 50.12                 | 5.01                  | 98.98              | 96.38              | 94.34                |
| S13128-RMB | 45.25               | 42.76                 | 4.28                  | 99.07              | 96.76              | 94.48                |
| S13192-LFB | 59.85               | 57.02                 | 5.70                  | 99.09              | 96.80              | 95.28                |
| S13192-LMB | 66.07               | 63.21                 | 6.32                  | 99.10              | 96.81              | 95.66                |
| S13192-RFB | 38.39               | 36.59                 | 3.66                  | 99.09              | 96.78              | 95.31                |
| S13192-RMB | 58.29               | 54.80                 | 5.48                  | 99.04              | 96.59              | 94.01                |
| S13290-LFB | 62.97               | 59.95                 | 6.00                  | 99.03              | 96.59              | 95.21                |
| S13290-LMB | 50.56               | 47.82                 | 4.78                  | 99.08              | 96.77              | 94.58                |
| S13290-RFB | 50.01               | 47.78                 | 4.78                  | 99.09              | 96.80              | 95.55                |
| S13290-RMB | 62.80               | 59.19                 | 5.92                  | 99.04              | 96.64              | 94.25                |

Q20: the rate of bases which quality is greater than 20.

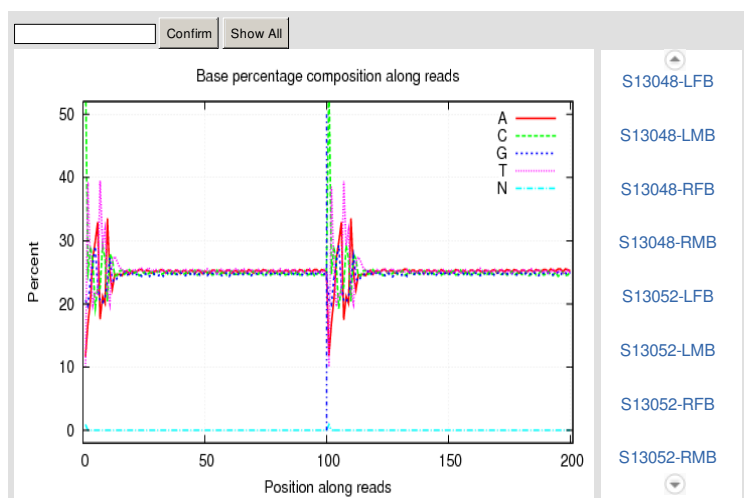

**Figure 1 Distribution of base composition on clean reads.** X axis represents base position along reads. Y axis represents base content percentage. As to high quality sequencing reads, A(adenine base) curve should be strictly overlapped with T(thymine base) curve and G(guanine base) curve should be overlapped with C(cytosine base) curve according to the principle of complementary of base pairing, excluding the first six base positions owing to Illumina sequencing platform using random hexamer-primer to synthesize cDNA which could result in PCR bias. As shown if figure, big fluctuations in first six base positions along reads, it is normal situation. If abnormal condition happens during sequencing, it may show an unbalanced composition.

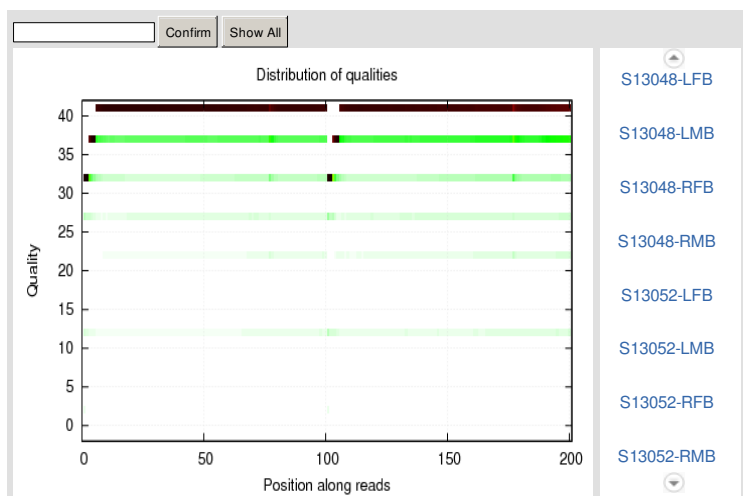

**Figure 2 Distribution of base quality on clean reads.** X axis represents base positions along reads. Y axis represents base quality value. Each dot in the image represents the number of total bases with certain quality value of the corresponding base along reads. Darker dot color means greater bases number. If the percentage of the bases with low quality (< 20) is very high, then the sequencing quality of this lane is bad.

### 3 Genome Mapping

After reads filtering, we map clean reads to reference genome use HISAT<sup>[1]</sup>. On average 94.59% reads are mapped, and the uniformity of the mapping result for each sample suggests that the samples are comparable. The mapping details are shown as **Table 2** .

**Table 2** Summary of Genome Mapping ([Download](#))

| Sample     | Total CleanReads | Total MappingRatio | Uniquely MappingRatio |
|------------|------------------|--------------------|-----------------------|
| S13048-LFB | 54,686,510       | 94.63%             | 88.43%                |
| S13048-LMB | 56,042,480       | 94.57%             | 89.13%                |
| S13048-RFB | 62,340,440       | 94.88%             | 88.95%                |
| S13048-RMB | 70,529,788       | 94.91%             | 89.69%                |
| S13052-LFB | 43,441,728       | 94.66%             | 88.09%                |
| S13052-LMB | 50,868,912       | 94.75%             | 88.66%                |
| S13052-RFB | 69,774,640       | 94.54%             | 87.98%                |
| S13052-RMB | 66,677,290       | 94.78%             | 88.78%                |
| S13097-LFB | 65,362,962       | 94.27%             | 87.82%                |
| S13097-LMB | 44,808,580       | 94.26%             | 87.75%                |
| S13097-RFB | 72,082,168       | 94.78%             | 88.35%                |
| S13097-RMB | 43,373,624       | 94.44%             | 88.25%                |
| S13128-LFB | 72,600,782       | 94.10%             | 87.25%                |
| S13128-LMB | 61,969,498       | 94.74%             | 88.46%                |
| S13128-RFB | 50,115,902       | 93.88%             | 86.93%                |
| S13128-RMB | 42,755,678       | 94.90%             | 88.82%                |
| S13192-LFB | 57,021,658       | 94.52%             | 87.94%                |
| S13192-LMB | 63,205,554       | 94.58%             | 88.23%                |
| S13192-RFB | 36,586,752       | 94.55%             | 88.87%                |
| S13192-RMB | 54,802,924       | 94.55%             | 87.96%                |
| S13290-LFB | 59,953,920       | 94.73%             | 88.59%                |
| S13290-LMB | 47,822,376       | 94.76%             | 88.97%                |
| S13290-RFB | 47,780,758       | 94.78%             | 88.69%                |
| S13290-RMB | 59,189,404       | 94.60%             | 88.77%                |

Uniquely Mapping: Reads that map to only one location of reference, called uniquely mapping.

#### 4 SNP and INDEL Detection

After genome mapping, we use GATK<sup>[2]</sup> to call **SNP** and **INDEL** variant for each sample. Final results are stored in VCF format. The **SNP** summary is shown as **Table 3** , and **Figure 3** . We also generate a friendly-interfaced **SNP** summary in EXCEL format shown as **Table 52** . And then we statistic the location of **SNP** and **INDEL** , shown as **Figure 4** and **Figure 5** .

**Table 3** SNP variant type summary. ([Download](#))

| Sample     | A-G    | C-T    | Transition | A-C    | A-T   | C-G    | G-T    | Transversion | Total   |
|------------|--------|--------|------------|--------|-------|--------|--------|--------------|---------|
| S13048-LFB | 37,527 | 37,058 | 74,585     | 6,405  | 4,793 | 8,732  | 6,513  | 26,443       | 101,028 |
| S13048-LMB | 48,878 | 48,319 | 97,197     | 8,368  | 6,091 | 11,296 | 8,502  | 34,257       | 131,454 |
| S13048-RFB | 44,620 | 43,955 | 88,575     | 7,649  | 5,631 | 10,222 | 7,712  | 31,214       | 119,789 |
| S13048-RMB | 60,882 | 60,533 | 121,415    | 10,371 | 7,831 | 13,701 | 10,497 | 42,400       | 163,815 |
| S13052-LFB | 35,729 | 35,446 | 71,175     | 5,944  | 4,242 | 7,989  | 5,906  | 24,081       | 95,256  |
| S13052-LMB | 42,259 | 41,495 | 83,754     | 7,023  | 5,060 | 9,443  | 7,115  | 28,641       | 112,395 |
| S13052-RFB | 48,695 | 47,917 | 96,612     | 7,852  | 5,676 | 10,406 | 7,806  | 31,740       | 128,352 |
| S13052-RMB | 54,958 | 53,683 | 108,641    | 8,887  | 6,546 | 11,798 | 8,893  | 36,124       | 144,765 |
| S13097-LFB | 37,405 | 36,912 | 74,317     | 6,267  | 4,472 | 8,532  | 6,308  | 25,579       | 99,896  |
| S13097-LMB | 28,187 | 28,243 | 56,430     | 4,840  | 3,446 | 6,661  | 4,802  | 19,749       | 76,179  |
| S13097-RFB | 35,946 | 35,109 | 71,055     | 6,192  | 4,334 | 8,344  | 6,181  | 25,051       | 96,106  |
| S13097-RMB | 32,715 | 32,588 | 65,303     | 5,485  | 3,959 | 7,542  | 5,471  | 22,457       | 87,760  |
| S13128-LFB | 39,401 | 38,891 | 78,292     | 6,489  | 4,594 | 8,758  | 6,436  | 26,277       | 104,569 |
| S13128-LMB | 41,154 | 40,619 | 81,773     | 6,782  | 4,874 | 9,067  | 6,883  | 27,606       | 109,379 |
| S13128-RFB | 33,517 | 33,348 | 66,865     | 5,553  | 3,922 | 7,507  | 5,534  | 22,516       | 89,381  |
| S13128-RMB | 29,111 | 28,684 | 57,795     | 4,964  | 3,616 | 6,637  | 4,987  | 20,204       | 77,999  |
| S13192-LFB | 44,129 | 43,372 | 87,501     | 7,180  | 5,229 | 9,434  | 7,151  | 28,994       | 116,495 |
| S13192-LMB | 40,127 | 39,279 | 79,406     | 6,618  | 4,837 | 8,914  | 6,611  | 26,980       | 106,386 |
| S13192-RFB | 51,584 | 51,179 | 102,763    | 7,995  | 6,091 | 10,591 | 7,991  | 32,668       | 135,431 |
| S13192-RMB | 31,258 | 30,663 | 61,921     | 5,234  | 3,818 | 7,117  | 5,261  | 21,430       | 83,351  |
| S13290-LFB | 43,394 | 42,696 | 86,090     | 7,368  | 5,149 | 9,421  | 7,241  | 29,179       | 115,269 |
| S13290-LMB | 38,352 | 37,930 | 76,282     | 6,431  | 4,641 | 8,700  | 6,499  | 26,271       | 102,553 |
| S13290-RFB | 36,437 | 35,914 | 72,351     | 6,106  | 4,397 | 8,155  | 6,258  | 24,916       | 97,267  |
| S13290-RMB | 40,244 | 39,855 | 80,099     | 6,796  | 5,087 | 8,816  | 6,880  | 27,579       | 107,678 |

Transition: variant between purines or pyrimidines. Transversion: variant between purine and pyrimidine.

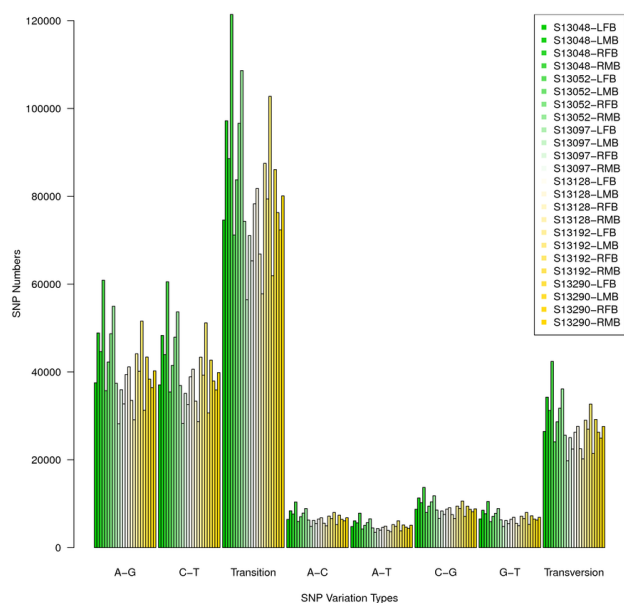

**Figure 3** SNP variant type distribution. X axis represents the type of SNP. Y axis represents the number of SNP.

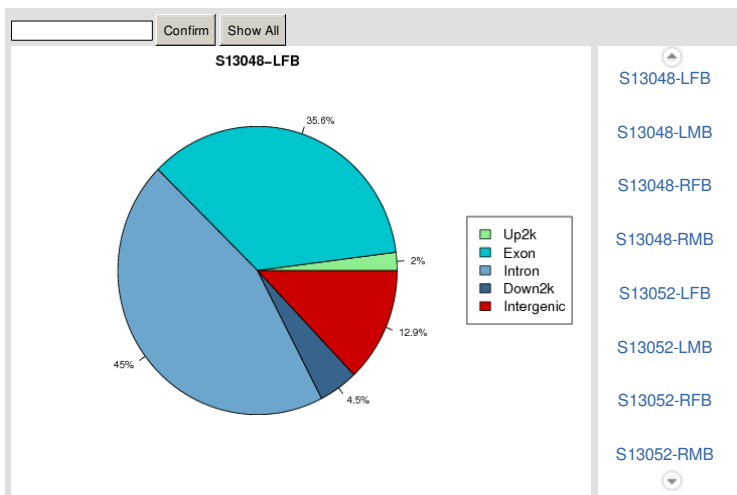

Figure 4 Distribution of SNP location. Up2k means upstream 2000 bp area of a gene. Down2k means downstream 2000 bp area of a gene.

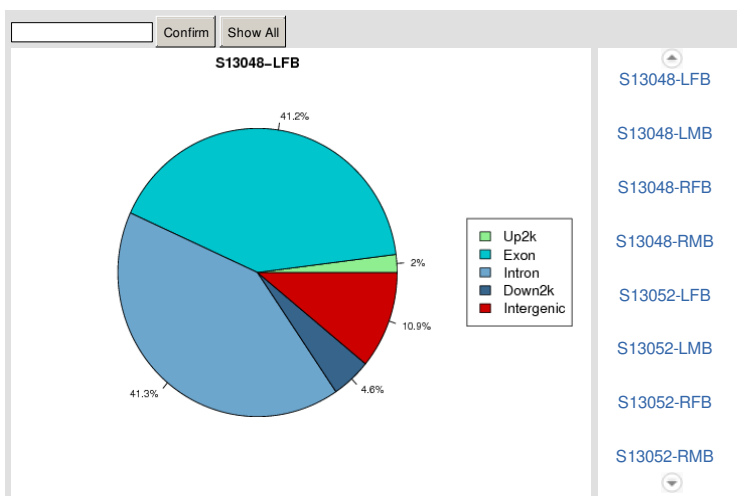

Figure 5 Distribution of INDEL location. Up2k means upstream 2000 bp area of a gene. Down2k means downstream 2000 bp area of a gene.

The VCF format **SNP** and **INDEL** result of each sample are shown as tables below (see VCF format in help page):

**Table 4** SNP list of S13048-LFB ([Download](#))

**Table 5** SNP list of S13048-LMB ([Download](#))

**Table 6** SNP list of S13048-RFB ([Download](#))

**Table 7** SNP list of S13048-RMB ([Download](#))

**Table 8** SNP list of S13052-LFB ([Download](#))

**Table 9** SNP list of S13052-LMB ([Download](#))

**Table 10** SNP list of S13052-RFB ([Download](#))

**Table 11** SNP list of S13052-RMB ([Download](#))

**Table 12** SNP list of S13097-LFB ([Download](#))

**Table 13** SNP list of S13097-LMB ([Download](#))

**Table 14** SNP list of S13097-RFB ([Download](#))

**Table 15** SNP list of S13097-RMB ([Download](#))

**Table 16** SNP list of S13128-LFB ([Download](#))

**Table 17** SNP list of S13128-LMB ([Download](#))

**Table 18** SNP list of S13128-RFB ([Download](#))

**Table 19** SNP list of S13128-RMB ([Download](#))

- Table 20** SNP list of S13192-LFB ([Download](#))
- Table 21** SNP list of S13192-LMB ([Download](#))
- Table 22** SNP list of S13192-RFB ([Download](#))
- Table 23** SNP list of S13192-RMB ([Download](#))
- Table 24** SNP list of S13290-LFB ([Download](#))
- Table 25** SNP list of S13290-LMB ([Download](#))
- Table 26** SNP list of S13290-RFB ([Download](#))
- Table 27** SNP list of S13290-RMB ([Download](#))
- Table 28** INDEL list of S13048-LFB ([Download](#))
- Table 29** INDEL list of S13048-LMB ([Download](#))
- Table 30** INDEL list of S13048-RFB ([Download](#))
- Table 31** INDEL list of S13048-RMB ([Download](#))
- Table 32** INDEL list of S13052-LFB ([Download](#))
- Table 33** INDEL list of S13052-LMB ([Download](#))
- Table 34** INDEL list of S13052-RFB ([Download](#))
- Table 35** INDEL list of S13052-RMB ([Download](#))
- Table 36** INDEL list of S13097-LFB ([Download](#))
- Table 37** INDEL list of S13097-LMB ([Download](#))
- Table 38** INDEL list of S13097-RFB ([Download](#))
- Table 39** INDEL list of S13097-RMB ([Download](#))
- Table 40** INDEL list of S13128-LFB ([Download](#))
- Table 41** INDEL list of S13128-LMB ([Download](#))
- Table 42** INDEL list of S13128-RFB ([Download](#))
- Table 43** INDEL list of S13128-RMB ([Download](#))
- Table 44** INDEL list of S13192-LFB ([Download](#))
- Table 45** INDEL list of S13192-LMB ([Download](#))
- Table 46** INDEL list of S13192-RFB ([Download](#))
- Table 47** INDEL list of S13192-RMB ([Download](#))
- Table 48** INDEL list of S13290-LFB ([Download](#))
- Table 49** INDEL list of S13290-LMB ([Download](#))
- Table 50** INDEL list of S13290-RFB ([Download](#))
- Table 51** INDEL list of S13290-RMB ([Download](#))
- Table 52** Summary of population SNP ([Download](#))

## 5 Gene Expression Analysis

After novel transcript detection, we merge novel coding transcripts with reference transcript to get complete reference, then we mapped clean reads to it use **Bowtie2** [3], then calculate gene expression level for each sample with **RSEM** [4]. The gene expression summary is shown as **Table 53** . And the gene expression list of each sample is shown as tables below(see Gene expression list format in help page).

We then calculate the reads coverage and the reads distribution on each detected transcript, shown as **Figure 6** and **Figure 7** , respectively . After that, we calculate pearson correlation between all samples, shown as **Figure 8** . Hierarchical clustering between all samples is also performed, shown as **Figure 9** .

- Table 53** Summary of gene expression ([Download](#))

| Sample     | Total CleanReads | Total MappingRatio | Uniquely MappingRatio | Total GeneNumber | Known GeneNumber | Novel GeneNumber | Total TranscriptNumber | Known TranscriptNumber | Novel TranscriptNumber |
|------------|------------------|--------------------|-----------------------|------------------|------------------|------------------|------------------------|------------------------|------------------------|
| S13048-LFB | 54,686,510       | 82.54%             | 34.25%                | 18846            | 18846            | 0                | 31219                  | 31219                  | 0                      |
| S13048-LMB | 56,042,480       | 78.65%             | 32.63%                | 19235            | 19235            | 0                | 32143                  | 32143                  | 0                      |
| S13048-RFB | 62,340,440       | 81.95%             | 34.14%                | 19139            | 19139            | 0                | 32037                  | 32037                  | 0                      |
| S13048-RMB | 70,529,788       | 76.34%             | 31.38%                | 19563            | 19563            | 0                | 33180                  | 33180                  | 0                      |
| S13052-LFB | 43,441,728       | 83.24%             | 34.52%                | 18589            | 18589            | 0                | 30333                  | 30333                  | 0                      |
| S13052-LMB | 50,868,912       | 82.13%             | 33.91%                | 18889            | 18889            | 0                | 31195                  | 31195                  | 0                      |
| S13052-RFB | 69,774,640       | 82.59%             | 34.30%                | 19181            | 19181            | 0                | 32263                  | 32263                  | 0                      |
| S13052-RMB | 66,677,290       | 80.33%             | 33.14%                | 19321            | 19321            | 0                | 32579                  | 32579                  | 0                      |
| S13097-LFB | 65,362,962       | 83.69%             | 35.27%                | 19011            | 19011            | 0                | 31880                  | 31880                  | 0                      |
| S13097-LMB | 44,808,580       | 84.66%             | 35.76%                | 18677            | 18677            | 0                | 30410                  | 30410                  | 0                      |
| S13097-RFB | 72,082,168       | 84.90%             | 35.74%                | 19163            | 19163            | 0                | 32434                  | 32434                  | 0                      |
| S13097-RMB | 43,373,624       | 83.26%             | 35.11%                | 18740            | 18740            | 0                | 30447                  | 30447                  | 0                      |
| S13128-LFB | 72,600,782       | 84.77%             | 35.08%                | 19135            | 19135            | 0                | 32363                  | 32363                  | 0                      |
| S13128-LMB | 61,969,498       | 83.87%             | 34.68%                | 19026            | 19026            | 0                | 32120                  | 32120                  | 0                      |
| S13128-RFB | 50,115,902       | 84.35%             | 34.95%                | 18773            | 18773            | 0                | 30897                  | 30897                  | 0                      |
| S13128-RMB | 42,755,678       | 84.33%             | 34.49%                | 18478            | 18478            | 0                | 30050                  | 30050                  | 0                      |
| S13192-LFB | 57,021,658       | 82.94%             | 34.31%                | 18839            | 18839            | 0                | 31323                  | 31323                  | 0                      |
| S13192-LMB | 63,205,554       | 84.52%             | 35.27%                | 18882            | 18882            | 0                | 31637                  | 31637                  | 0                      |
| S13192-RFB | 36,586,752       | 73.04%             | 30.04%                | 18679            | 18679            | 0                | 29979                  | 29979                  | 0                      |
| S13192-RMB | 54,802,924       | 85.26%             | 35.31%                | 18704            | 18704            | 0                | 30914                  | 30914                  | 0                      |
| S13290-LFB | 59,953,920       | 82.65%             | 34.50%                | 18904            | 18904            | 0                | 31430                  | 31430                  | 0                      |
| S13290-LMB | 47,822,376       | 82.97%             | 34.58%                | 18714            | 18714            | 0                | 30688                  | 30688                  | 0                      |
| S13290-RFB | 47,780,758       | 83.42%             | 34.84%                | 18583            | 18583            | 0                | 30530                  | 30530                  | 0                      |
| S13290-RMB | 59,189,404       | 80.89%             | 33.03%                | 18849            | 18849            | 0                | 30992                  | 30992                  | 0                      |

Uniquely Mapping: Reads that map to only one location of reference, called uniquely mapping.



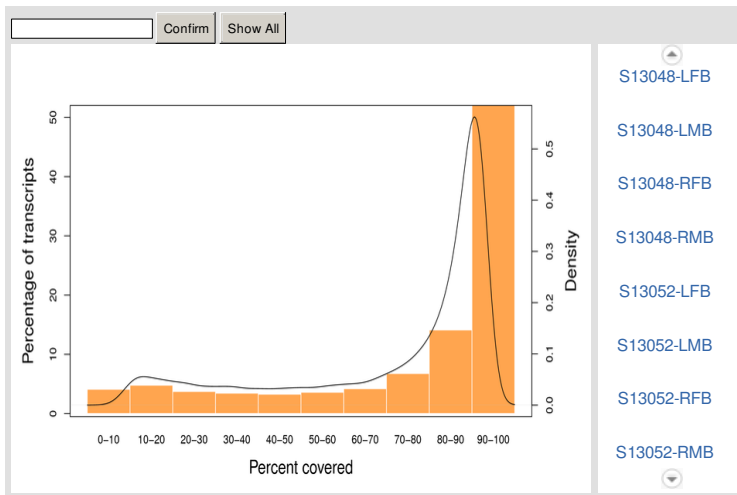

Figure 6 Reads coverage on transcripts. X axis represents the reads coverage. Y axis on left represents the percentage of transcripts. Y axis on right represents the density of transcripts.

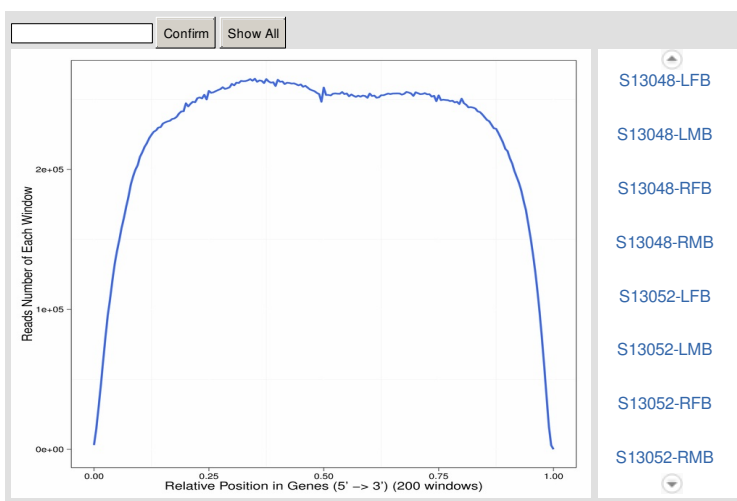

Figure 7 Reads distribution on transcripts. X axis represents the position along transcripts. Y axis represents the number of reads.

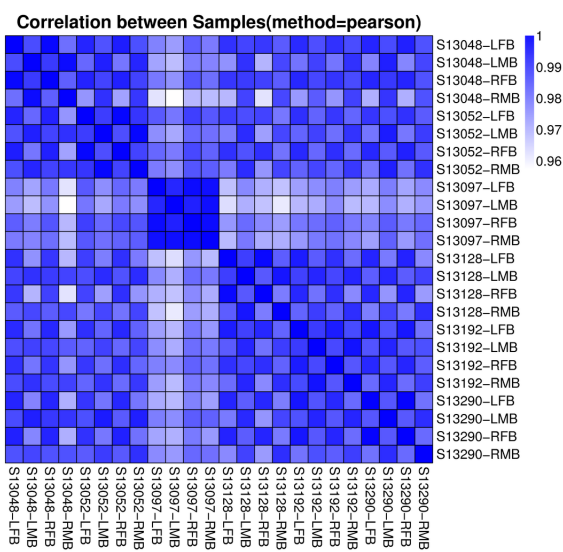

Figure 8 Heatmap of Pearson correlation between samples. Both X and Y axis represent each sample. Coloring indicate Pearson correlation (high: blue, low: white).

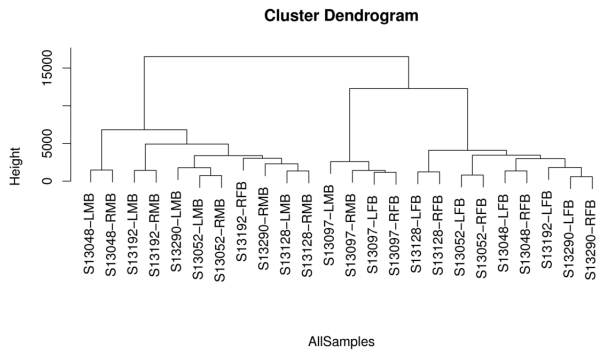

**Figure 9 Hierarchical clustering between samples.** More closer indicate more similar expression profile between samples.

- Table 54** Expressed gene list of S13048-LFB ([Download](#))
- Table 55** Expressed gene list of S13048-LMB ([Download](#))
- Table 56** Expressed gene list of S13048-RFB ([Download](#))
- Table 57** Expressed gene list of S13048-RMB ([Download](#))
- Table 58** Expressed gene list of S13052-LFB ([Download](#))
- Table 59** Expressed gene list of S13052-LMB ([Download](#))
- Table 60** Expressed gene list of S13052-RFB ([Download](#))
- Table 61** Expressed gene list of S13052-RMB ([Download](#))
- Table 62** Expressed gene list of S13097-LFB ([Download](#))
- Table 63** Expressed gene list of S13097-LMB ([Download](#))
- Table 64** Expressed gene list of S13097-RFB ([Download](#))
- Table 65** Expressed gene list of S13097-RMB ([Download](#))
- Table 66** Expressed gene list of S13128-LFB ([Download](#))
- Table 67** Expressed gene list of S13128-LMB ([Download](#))
- Table 68** Expressed gene list of S13128-RFB ([Download](#))
- Table 69** Expressed gene list of S13128-RMB ([Download](#))
- Table 70** Expressed gene list of S13192-LFB ([Download](#))
- Table 71** Expressed gene list of S13192-LMB ([Download](#))
- Table 72** Expressed gene list of S13192-RFB ([Download](#))
- Table 73** Expressed gene list of S13192-RMB ([Download](#))
- Table 74** Expressed gene list of S13290-LFB ([Download](#))
- Table 75** Expressed gene list of S13290-LMB ([Download](#))
- Table 76** Expressed gene list of S13290-RFB ([Download](#))
- Table 77** Expressed gene list of S13290-RMB ([Download](#))

## Methods

## 1 Transcriptome Resequencing Study Process

After extract total RNA and treated with DNase I, Oligo(dT) are used to isolate mRNA. Mixed with the fragmentation buffer, the mRNA are fragmented. Then **cdNA** is synthesized using the mRNA fragments as templates. Short fragments are purified and resolved with EB buffer for end reparation and single nucleotide A (adenine) addition. After that, the short fragments are connected with adapters. The suitable fragments are selected for the **PCR** amplification. During the QC steps, Agilent 2100 Bioanalyzer and ABI StepOnePlus Real-Time **PCR** System are used in quantification and qualification of the sample library. Then the library is sequenced using Illumina HiSeq4000 or other sequencer when necessary.

After sequencing, we get raw reads. Firstly, we filter low-quality, adaptor-polluted and high content of unknown base(N) reads to get clean reads. And then mapping clean reads to reference genome, after that, novel transcript prediction **SNP & INDEL** detection differentially splicing gene( **DSG** ) detection are performed. After we get novel transcripts, we merge coding transcripts of them with referecne transcript to get a complete reference, then we perform gene expression analysis with this reference. After that, we can detect Differentially Expression Gene( **DEG** ) and perform further functional enrichment analysis between samples(two samples at least). Schematic overview of the comprehensive process is shown as **Figure 1** .

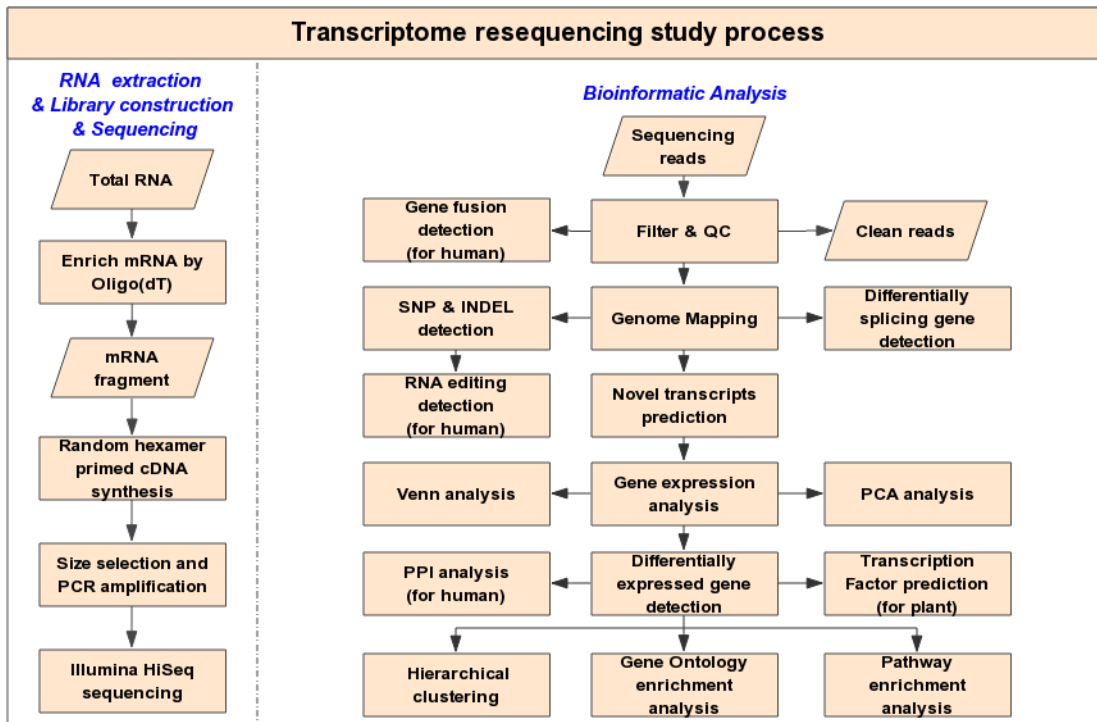

Figure 1 Transcriptome resequencing study process. Schematic overview of the study process.

## 2 Sequencing Reads Filtering

We define raw reads as reads which containing low-quality, adaptor-polluted and high content of unknown base(N) reads additionally, these noise reads should be removed before downstream analyses. We use internal software to filter reads, followed as:

- 1) Remove reads with adaptors;
- 2) Remove reads in which unknown bases(N) are more than 5%;
- 3) Remove low quality reads (we define the low quality read as the percentage of base which quality is lesser than 15 is greater than 20% in a read).

After filtering, the remaining reads are called "Clean Reads" and stored in FASTQ <sup>[8]</sup> format (see FASTQ Format in help page).

## 3 Genome Mapping

We use HISAT<sup>[1]</sup> to perform genome mapping, HISAT is a fast and sensitive spliced alignment program for mapping RNA-seq reads with equal or better accuracy than any other method. The paper show that, for simulated 20 million 100bp reads, the distribution of read types are shown as **Figure 2** , about 40% reads are spanning multiple exons, HISAT perform very well on this type reads.

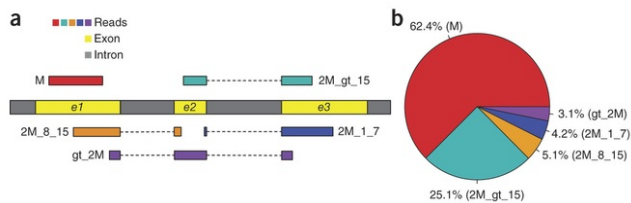

**Figure 2 Distribution of read types.** (a) Five types of RNA-seq reads: (i) M, exonic read; (ii) 2M\_gt\_15, junction reads with long, >15-bp anchors in both exons; (iii) 2M\_8\_15, junction reads with intermediate, 8- to 15-bp anchors; (iv) 2M\_1\_7, junction reads with short, 1- to 7-bp, anchors; and (v) gt\_2M, junction reads spanning more than two exons. (b) Relative proportions of different types of reads in the 20 million 100-bp simulated read data.

Software information:

**HISAT:**  
 version: v0.1.6-beta  
 parameters: --phred64 --sensitive --no-discordant --no-mixed -l 1 -X 1000

#### 4 SNP and INDEL Detection

With genome mapping result, we use GATK<sup>[2]</sup> to call **SNP** and **INDEL** for each sample. After filter out the unreliable sites, we get the final **SNP** and **INDEL** in VCF format. Software information:

**GATK:**  
 version: v3.4-0  
 parameters(call): --allowPotentiallyMisencodedQuals -stand\_call\_conf 20.0 -stand\_emit\_conf 20.0  
 parameters(filter): --window 35 -cluster 3 -filterName FS -filter "FS > 30.0" -filterName QD -filter "QD < 2.0"  
 website: <https://www.broadinstitute.org/gatk>

#### 5 Gene Expression Analysis

we mapped clean reads to reference using **Bowtie2**<sup>[3]</sup>, and then calculate gene expression level with **RSEM**<sup>[4]</sup>. **RSEM** is a software package for estimating gene and isoform expression levels from RNA-Seq data. With mapping result, we calculate reads coverage and reads distribution on transcripts. For a sample with high quality and deep-enough depth, most of transcripts would be entirely covered, and mapped reads would be uniformly distributed on transcripts. After that, we calculate pearson correlation between all samples use cor, a function of R. After that, we perform hierarchical clustering between all samples use hclust, a function of R. Software information:

**Bowtie2 :**  
 version: v2.2.5  
 parameters: -q --phred64 --sensitive --dpad 0 --gbar 99999999 --mp 1,1 --np 1 --score-min L,0,-0.1 -l 1 -X 1000 --no-mixed --no-discordant -p 1 -k 200  
 website: <http://bowtie-bio.sourceforge.net/Bowtie2/index.shtml>  
**RSEM :**  
 version: v1.2.12  
 parameters: default  
 website: <http://deweylab.biostat.wisc.edu/RSEM>

### Help

#### 1 FASTQ Format

The original image data is transferred into sequence data via **base calling**, which is defined as raw data or raw reads and saved as FASTQ file. Those FASTQ files are the original data provided for users, including detailed read sequences and the read quality information. In each FASTQ file, every read is described by four lines, listed as follows:

```
@A80GVTABXX:4:1:2587:1979#ACAGTGAT/1
NTTTGATATGTGTGAGGACGTCTGCAGCGTCACCTTTATCGGCCATGGT
+
BMMTKZXUUUddddddddddddddddddaddddd^WYYU
```

The first and third lines are sequences names generated by the sequence analyzer; the second line is sequence; the fourth line is **sequencing quality** value, in which each letter corresponds to the base in line 2; the base quality is equal to ASCII value of the character in line 4 minus 64 (we call the quality system is Phred+64), e.g. the

ASCII value of c is 99, then its base quality value is 35. Starting from the Illumina GA Pipeline v1.5, the range of base quality values is from 2 to 41. **Table 1** demonstrates the relationship between **sequencing error** rate and the **sequencing quality** value. Specifically, if the **sequencing error** rate is denoted as E and base quality value is denoted as Q, the relationship is as following formula:

$$SQ = -10 \times (\log \frac{E}{1-E}) / (\log 10)$$

$$E = \frac{Y}{1+Y}$$

$$Y = \frac{SQ}{e^{-10 \times \log 10}}$$

**Table 1** Relationship between sequencing error rate and sequencing quality value ([Download](#))

| Sequencing Error Rate(%) | Sequencing Quality Value | Character(Phred+46) | Character(Phred+33) |
|--------------------------|--------------------------|---------------------|---------------------|
| 1.00                     | 20                       | T                   | 5                   |
| 0.10                     | 30                       | ^                   | ?                   |
| 0.01                     | 40                       | h                   | l                   |

More detail information about FASTQ format can be got in website [http://en.wikipedia.org/wiki/FASTQ\\_format](http://en.wikipedia.org/wiki/FASTQ_format).

**Note:** The quality system of Illumina HiSeq 2000(or 2500) is Phred+64, and the quality system of Illumina HiSeq 4000 is Phred+33. For the reads sequencing by Illumina HiSeq 4000, in considering of the compatibility of softwares used in our study, we will convert the quality system from Phred+33 to Phred+64 for both raw data and clean data.

## 2 What is TF

In molecular biology and genetics, a transcription factor (sometimes called a sequence-specific DNA-binding factor) is a protein that binds to specific DNA sequences, thereby controlling the rate of transcription of genetic information from DNA to messenger RNA. Transcription factors perform this function alone or with other proteins in a complex, by promoting (as an activator), or blocking (as a repressor) the recruitment of RNA polymerase (the enzyme that performs the transcription of genetic information from DNA to RNA) to specific genes. See wiki for detail [https://en.wikipedia.org/wiki/Transcription\\_factor](https://en.wikipedia.org/wiki/Transcription_factor).

## 3 RNA editing format

RNA editing list of each sample is stored in CNS format. See <http://soap.genomics.org.cn/soapsnp.html> Output Format for detail.

## 4 Gene fusion format

Gene fusion list of each sample is stored in tab-separated text file. See <http://soap.genomics.org.cn/soapfuse.html> Output Files for detail.

## 5 DSG format

Differentially Splicing Gene (**DSG**) result of each compare plan is stored in tab-separated text file Files/BGI\_result/3.DifferentiallySplicingGene/\*/\*.GeneDiffSplice.xls with the format described in **Table 2**.

**Table 2** Format of differentially splicing gene result list. ([Download](#))

| Field                | Description                                                                     | Notes                   |
|----------------------|---------------------------------------------------------------------------------|-------------------------|
| GeneID               | gene identity                                                                   | -                       |
| Chr                  | chromosome                                                                      | -                       |
| Strand               | strand                                                                          | -                       |
| Control-IC           | inclusion junction counts for Control sample, replicates are separated by comma | -                       |
| Control-SC           | skipping junction counts for Control sample, replicates are separated by comma  | -                       |
| Treat-IC             | inclusion junction counts for Treat sample, replicates are separated by comma   | -                       |
| Treat-SC             | skipping junction counts for Treat sample, replicates are separated by comma    | -                       |
| Pvalue               | statistical significance                                                        | -                       |
| FDR                  | false discovery ratio                                                           | -                       |
| longExonStart        | the long exon start position on chromosome                                      | for A3SS and A5SS event |
| longExonEnd          | the long exon end position on chromosome                                        | for A3SS and A5SS event |
| shortExonStart       | the short exon start position on chromosome                                     | for A3SS and A5SS event |
| shortExonEnd         | the short exon end position on chromosome                                       | for A3SS and A5SS event |
| flankingExonStart    | the flanking exon start position on chromosome                                  | for A3SS and A5SS event |
| flankingExonEnd      | the flanking exon end position on chromosome                                    | for A3SS and A5SS event |
| 1stExonStart         | the first exon start position on chromosome                                     | for MXE event           |
| 1stExonEnd           | the first exon end position on chromosome                                       | for MXE event           |
| 2ndExonStart         | the second exon start position on chromosome                                    | for MXE event           |
| 2ndExonEnd           | the second exon end position on chromosome                                      | for MXE event           |
| riExonStart          | the intron-retained exon start position on chromosome                           | for RI event            |
| riExonEnd            | the intron-retained exon end position on chromosome                             | for RI event            |
| skipExonStart        | the skipped exon start position on chromosome                                   | for SE event            |
| skipExonEnd          | the skipped exon end position on chromosome                                     | for SE event            |
| upstreamExonStart    | the upstream exon start position on chromosome                                  | for RI and SE event     |
| upstreamExonEnd      | the upstream exon end position on chromosome                                    | for RI and SE event     |
| downstreamExonStart  | the downstream exon start position on chromosome                                | for RI and SE event     |
| downstreamExonEnd    | the downstream exon end position on chromosome                                  | for RI and SE event     |
| LongExonTranscripts  | the transcripts that contain long exon, separated by comma                      | for A3SS and A5SS event |
| ShortExonTranscripts | the transcripts that contain short exon, separated by comma                     | for A3SS and A5SS event |
| 1stExonTranscripts   | the transcripts that contain first exon, separated by comma                     | for MXE event           |
| 2ndExonTranscripts   | the transcripts that contain second exon, separated by comma                    | for MXE event           |
| RetainTranscripts    | the transcripts that contain intron-retained exon, separated by comma           | for RI event            |
| AbandonTranscripts   | the transcripts that exclude intron-retained exon, separated by comma           | for RI event            |
| InclusionTranscripts | the transcripts that include certain exon, separated by comma                   | for SE event            |
| SkippingTranscripts  | the transcripts that exclude certain exon, separated by comma                   | for SE event            |

## 6 Gene expression list format

Gene expression result of each sample is stored in tab-separated text file Files/BGI\_result/4.Quantify/GeneExpression/\*.*gene.fpkm.xls*(\* presents sample name) with the format described in **Table 3** .

**Table 3** Format description of gene expression result list. ([Download](#))

| Field            | Description                                              |
|------------------|----------------------------------------------------------|
| gene_id          | gene ID number                                           |
| transcript_id(s) | transcript list of gene, separated by comma              |
| length           | length of gene after model regulation                    |
| expected_count   | support reads number to this gene after model regulation |
| FPKM             | FPKM value of this gene                                  |

## 7 DEG list format

The result of differentially expressed genes for each control-treatment pairwise is stored in tab-separated text file Files/BGI\_result/5.Quantify/DifferentExpressedGene/\*.*GeneDiffExpFilter.xls*(\* presents pairwise name) with the format description in **Table 4** .

**Table 4** Format description of DEGs screening result file. ([Download](#))

| Field                               | Description                                                                          |
|-------------------------------------|--------------------------------------------------------------------------------------|
| Unigene                             | Unigene ID                                                                           |
| Length                              | Unigene length                                                                       |
| Sample1-Expression                  | Unigene expression of control sample(s)                                              |
| Sample2-Expression                  | Unigene expression of treat sample(s)                                                |
| log2FoldChange(Sample2/Sample1)     | log2 transformed fold change between control and treat samples                       |
| Pvalue                              | Statistic of pvalue(PossionDis or DEseq2 method used)                                |
| FDR                                 | Statistic of false discovery rate(PossinoDis method used)                            |
| Padj                                | Statistic of adjusted pvalue(DEseq2 method used)                                     |
| PPEE                                | Statistic of posterior probability of being equivalent expression(EBseq method used) |
| Probability                         | Statistic of probability of being DEG(NOIseq method used)                            |
| Up/Down-Regulation(Sample2/Sample1) | Flags indicate up-regulated DEG(Up) or down-regulated DEG(Down) or non-DEG(*)        |

## 8 MA plot

The MA plot is a plot of the distribution of the red/green intensity ratio ('M') plotted by the average intensity ('A'). M and A are defined by the following equations:

$$M = \log_2(R/G) = \log_2(R) - \log_2(G)$$

$$A = \frac{1}{2} \log_2(RG) = \frac{1}{2}(\log_2(R) + \log_2(G))$$

See wiki for detail [https://en.wikipedia.org/wiki/MA\\_plot](https://en.wikipedia.org/wiki/MA_plot).

## 9 Volcano plot

The Volcano plot is a type of scatter-plot that is used to quickly identify changes in large datasets, It plots significance versus fold-change on the y- and x-axes, respectively. See wiki for detail [https://en.wikipedia.org/wiki/Volcano\\_plot\\_\(statistics\)](https://en.wikipedia.org/wiki/Volcano_plot_(statistics)).

## 10 Cluster list format

The format of cluster list is described as **Table 5** .

**Table 5** Format description of DEGs clustering list. ([Download](#))

| Field   | Description              |
|---------|--------------------------|
| Unigene | Unigene ID               |
| A-VS-B  | log2FoldChange of A-VS-B |
| C-VS-D  | log2FoldChange of C-VS-D |
| ...     | ...                      |

## 11 VCF format

Variant Call Format (VCF) is a flexible and extendable format for variation data such as single nucleotide variants, insertions/deletions, copy number variants and structural variants. See details at UCSC website <http://genome.ucsc.edu/FAQ/FAQformat.html#format10.1>

## 12 How to read DEG GO enrichment analysis result

Make sure that the computer has installed java and use IE brower to open *GOView.html*. The left navigation includes three types of GO terms for each control-treatment pairwise (C: cellular component, P: biological process, F: molecular function). Click one of them, the enriched GO terms result will be listed as **Figure 3** .

| Gene Ontology term                              | Cluster frequency         | Genome frequency of use         | Corrected P-value | Expression Profile          |
|-------------------------------------------------|---------------------------|---------------------------------|-------------------|-----------------------------|
| <a href="#">BLOC complex (view genes)</a>       | 2 out of 82 genes, 2.4%   | 8 out of 16090 genes, 0.0%      | 0.03943           | <a href="#">View Result</a> |
| <a href="#">cytosol (view genes)</a>            | 2 out of 82 genes, 2.4%   | 15 out of 16090 genes, 0.1%     | 0.14450           | <a href="#">View Result</a> |
| <a href="#">cytosolic part (view genes)</a>     | 2 out of 82 genes, 2.4%   | 15 out of 16090 genes, 0.1%     | 0.14450           | <a href="#">View Result</a> |
| <a href="#">intracellular part (view genes)</a> | 67 out of 82 genes, 81.7% | 11513 out of 16090 genes, 71.6% | 1                 | <a href="#">View Result</a> |

**Figure 3** Significantly enriched GO terms in DEGs. Column 1 is GO term name. Column 2 is the ratio of DEGs enriched to this GO term. Column 3 is the ratio of genes enriched to this GO term in background database. Column 4 is Corrected P-value which indicates the degree of enrichment and the smaller Corrected P-value, the more significantly DEGs enriched to this GO term. The result list has been sorted by Corrected P-value. Column 5 is clustering of foldchange value for these enriched DEGs using the tools cluster<sup>[5]</sup> <sup>[6]</sup> and javaTreeView<sup>[7]</sup>.

Click the term name 'BLOC complex' in Figure 3 , you can go to <http://amigo.geneontology.org/amigo> for more information when the computer is Internet-connected. Click 'view genes' in Figure 3 , you can get gene IDs that enriched to this GO term as Figure 4 .

|              |                  |
|--------------|------------------|
| BLOC complex | 63915, 100526837 |
| cytosol      | 63915, 100526837 |

Figure 4 Gene ID list related to GO terms. There are two DEGs enriched to the term 'BLOC complex': 63915, 100526837.

### 13 How to read DEG pathway enrichment analysis result

Open html report for pathway enrichment result and the enriched KEGG pathways will be listed as Figure 5 .

| 1. sample3-VS-sample4 |                                                      |                                     |                                           |              |              |            |
|-----------------------|------------------------------------------------------|-------------------------------------|-------------------------------------------|--------------|--------------|------------|
| #                     | Pathway                                              | DEGs with pathway annotation (1432) | All genes with pathway annotation (17252) | Pvalue       | Qvalue       | Pathway ID |
| 1                     | <a href="#">Pathways in cancer</a>                   | 81 (5.66%)                          | 531 (3.08%)                               | 5.562454e-08 | 1.074132e-05 | ko05200    |
| 2                     | <a href="#">Focal adhesion</a>                       | 74 (5.17%)                          | 475 (2.75%)                               | 8.877128e-08 | 1.074132e-05 | ko04510    |
| 3                     | <a href="#">Leukocyte transendothelial migration</a> | 46 (3.21%)                          | 280 (1.62%)                               | 5.86161e-06  | 3.950743e-04 | ko04670    |
| 4                     | <a href="#">Rheumatoid arthritis</a>                 | 25 (1.75%)                          | 115 (0.67%)                               | 6.530153e-06 | 3.950743e-04 | ko05323    |
| 5                     | <a href="#">Malaria</a>                              | 19 (1.33%)                          | 76 (0.44%)                                | 1.00329e-05  | 4.855924e-04 | ko05144    |

Figure 5 Pathway enrichment analysis of DEGs. Column 1 is ordinal number. Column 2 is pathway name. Column 3 is the ratio of DEGs enriched to this pathway. Column 4 is the ratio of genes enriched to this pathway in background database. Pvalue and Qvalue are both values that indicate the degree of enrichment and Qvalue is corrected Pvalue. The smaller they are, the more significantly DEGs enriched to this pathway. The result list has been sorted by Qvalue. The last column pathway ID corresponding to pathway name.

Click pathway name 'Leukocyte transendothelial migration' in Figure 5 , you can get gene IDs that enriched to it as Figure 6 .

|   |                                                      |                                                                                                                                                                                                                                                                                                               |
|---|------------------------------------------------------|---------------------------------------------------------------------------------------------------------------------------------------------------------------------------------------------------------------------------------------------------------------------------------------------------------------|
| 3 | <a href="#">Leukocyte transendothelial migration</a> | 146850, 654463, 5909, 4318, 1364, 402415, 3383, 2888, 100528016, 5175, 9404, 149461, 285590, 5880, 50507, 79778, 58494, 8572, 8481, 6525, 5603, 90799, 55691, 100506649, 29970, 4739, 6876, 55679, 5010, 9076, 9411, 26509, 9758, 10398, 8727, 7412, 7070, 6387, 8502, 7430, 7414, 71, 60, 4771, 80014, 51306 |
| 4 | <a href="#">Rheumatoid arthritis</a>                 | 2921, 6364, 6374, 3576, 3553, 4319, 2920, 2919, 3552, 4314, 2353, 4312, 3589, 100288077, 3383, 7099, 7422, 1514, 7040, 533, 7042, 6387, 284, 5157, 6347                                                                                                                                                       |

Figure 6 Gene ID list related to pathway. There are 46 DEGs enriched to the pathway 'Leukocyte transendothelial migration'.

Furtherly, detecting the most significant pathways, the enrichment analysis of **DEG** pathway significance, allows us to see detailed pathway information in KEGG database. For example, clicking the hyperlink on 'Leukocyte transendothelial migration' in Figure 6 will get detailed information as shown in Figure 7 .

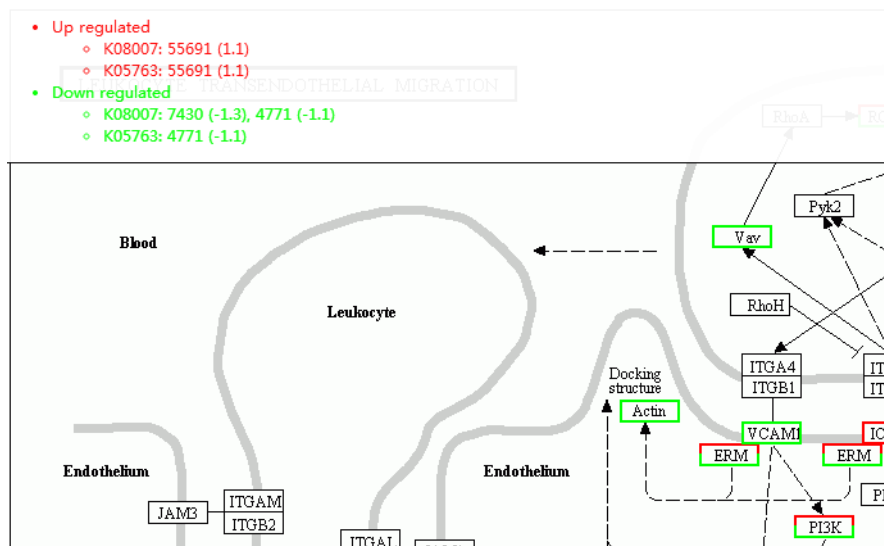

Figure 7 An example of KEGG pathway of 'Leukocyte transendothelial migration'. Up-regulated genes are marked with red borders and down-regulated genes with green borders. Non-change genes are marked with black borders. When mouse hover on border with red or green, the related DEGs appear on the top left. Clicking gene name in the figure, the page will redirect to KEGG website if the computer is Internet-connected.



## References

- [1] Kim D, et al. (2015). HISAT: a fast spliced aligner with low memory requirements. *Nature Methods* 2015.
- [2] McKenna A, et al. (2010). The Genome Analysis Toolkit: a MapReduce framework for analyzing next-generation DNA sequencing data. *Genome Res.* 2010 Sep;20(9):1297-303.
- [3] Langmead B, et al. (2012). Fast gapped-read alignment with Bowtie 2. *Nature Methods.* 2012, 9:357-359.
- [4] Li B, et al. (2011). RSEM: accurate transcript quantification from RNA-Seq data with or without a reference genome. *BMC Bioinformatics.* 2011 Aug 4;12:323.
- [5] Eisen, M. B., et al. (2001). Cluster analysis and display of genome-wide expression patterns. *Proc Natl Acad Sci USA*, (1998)95(25): 14863-8. 2001.29: 1165-1188.
- [6] M. J. L. de Hoon, et al. (2004). Open Source Clustering Software. *Bioinformatics*, 20(9): 1453-1454.
- [7] Saldanha, A. J. (2004). Java Treeview--extensible visualization of microarray data. *Bioinformatics*, 20(17): 3246-8.
- [8] Cock P., et al. (2010). The Sanger FASTQ file format for sequences with quality scores, and the Solexa/Illumina FASTQ variants. *Nucleic Acids Research*, 38(6): 1767-1771.
